# Supplementary material for: Prediction in Marketing Using the Support Vector Machine
Source: Atypon-hosted journal article supplement (doi:10.1287/mksc.1050.0123), 2005-11-01
Supplement: mksc.1050.0123-sm-technical-appendix-a.pdf [file mksc.1050.0123-sm-technical-appendix-a.pdf]

## Website Appendix A

### Methodology for the Discriminant Example

#### Discriminant Problem

Let  $\mathbf{x} = (x_1 \ x_2)^T$  be drawn with probability .5 from either of two groups  $G_1 : N\left(\begin{bmatrix} 0 \\ 0 \end{bmatrix}, \begin{bmatrix} 1 & 0 \\ 0 & 1 \end{bmatrix}\right)$

or  $G_2 : N\left(\begin{bmatrix} 2 \\ 0 \end{bmatrix}, \begin{bmatrix} 1 & .5 \\ .5 & 1 \end{bmatrix}\right)$ . For a fixed estimation sample size,  $l \in \{10, 50, 100, 200, 400\}$  and a

given trial,  $T$ , within this sample size, results are based on the methodology illustrated in *Table WA-1*.

*Table WA-1: Discriminant Methodology*

|                          |                   |                                    |             |             |             |
|--------------------------|-------------------|------------------------------------|-------------|-------------|-------------|
| <i>Sample Size = l</i>   |                   |                                    |             |             |             |
| <i>Trial = T / l</i>     |                   |                                    |             |             |             |
|                          |                   | <i>Predicted by Model (L or Q)</i> |             |             |             |
| <i>Estimation Sample</i> |                   | $G_1$                              | $G_2$       |             |             |
| $l_1 = .5l$              | <i>True Group</i> | $G_1$                              | $N_{11}$    | $N_{12}$    | $N_1 = 500$ |
| $l_2 = .5l$              |                   | $G_2$                              | $N_{21}$    | $N_{22}$    | $N_2 = 500$ |
| $l = l_1 + l_2$          |                   |                                    | $\hat{N}_1$ | $\hat{N}_2$ | $N = 1,000$ |

On trial  $T$  (given  $l$ ), parameters of each model ( $L \equiv$  linear and  $Q \equiv$  quadratic) are estimated on the basis of  $l$  observations drawn according to the priors (.5/.5). Each instantiated model is then used to predict the class membership for each of the (same)  $N=1,000$  observations drawn randomly from the two populations, again respecting the priors, or  $N_g = 500$  from each group,  $g=1,2$ .

The error rate on trial  $T$  for model  $L$  or  $Q$  is the percent of observations misclassified by the

model calculated as  $R_{emp|T}^{L \text{ or } Q} = \frac{N_{12}^{L \text{ or } Q} + N_{21}^{L \text{ or } Q}}{1,000}$ . The mean error rate and standard deviation are

computed directly from the trial-by-trial results; i.e., the mean is the arithmetic average of these values over  $T=100$  trials for a given  $l$ .

### *Decision Boundaries*

Given the parameters of  $G_1$  and  $G_2$  above, the classification rule that minimizes the expected misclassification loss is given by expression (WA1). (See Johnson and Wichern, 2002.)

$$-\frac{1}{2} \mathbf{x}^T (\Sigma_1^{-1} - \Sigma_2^{-1}) \mathbf{x} + (\mu_1^T \Sigma_1^{-1} - \mu_2^T \Sigma_2^{-1}) \mathbf{x} - k \geq \ln \left[ \frac{c(1|2)}{c(2|1)} \left( \frac{\pi_2}{\pi_1} \right) \right] \quad (\text{WA1})$$

Solving for the constant  $k$  yields a quadratic equation in  $\mathbf{x} = (x_1 \quad x_2)^T$ . Using the parameters for the present problem, we find that  $Q$  is described by the quadratic equation (WA2).

$$x_2 = 3 \left( -\frac{4}{3} + \frac{2}{3}x_1 + .57735 \left( .287682 - 1.33227 \times 10^{-15} x_1 + x_1^2 \right)^{\frac{1}{2}} \right) \quad (\text{WA2})$$

Using the pooled  $vcv$  matrix with the mean vectors yields the linear boundary ( $L$ ) given by equation (WA3).

$$x_2 = -4 + 4x_1 \quad (\text{WA3})$$

### *Iso-Probability Contours for Bivariate Normal*

Thomasian (1969) provides the expression (WA4) in  $\mu_1, \mu_2, \sigma_1, \sigma_2,$  and  $\rho$  for the iso-probability contours of a bivariate Normal density.

$$g(x_1, x_2) = \frac{1}{1-\rho^2} \left[ \left( \frac{x_1 - \mu_1}{\sigma_1} \right)^2 - 2\rho \frac{x_1 - \mu_1}{\sigma_1} \times \frac{x_2 - \mu_2}{\sigma_2} + \left( \frac{x_2 - \mu_2}{\sigma_2} \right)^2 \right] \quad (\text{WA4})$$

Setting  $g(x_1, x_2) = \delta$  for various  $\delta > 0$  determines concentric ellipses in the  $x_1, x_2$  plane.

### References

Johnson, Richard A. and Dan W. Wichern (2002), *Applied Multivariate Statistical Analysis* (5<sup>th</sup> edition), Prentice-Hall, Inc

Thomasian, Aram J. (1969), *The Structure of Probability Theory with Applications*, McGraw-Hill, Inc
